# Supplementary material for: Multiplexed smFRET Nucleic Acid Sensing Using DNA Nanotweezers
Source: MDPI journal article supplement (doi:10.3390/bios13010119), 2023-01-10
Supplement: s1 [file s1]

## Supporting Information

# Multiplexed smFRET Nucleic Acid Sensing Using DNA Nanotweezers

Anisa Kaur †, Roaa Mahmoud †, Anoja Megalathan, Sydney Pettit and Soma Dhakal \*

Department of Chemistry, Virginia Commonwealth University, Richmond, VA 23284, USA

\* Correspondence: sndhakal@vcu.edu

† These authors contributed equally to this work.

**Table S1.** DNA sequences for DNA oligonucleotides used in NT sensor assembly.

| Name           | Sequence (5' → 3')                                                         |
|----------------|----------------------------------------------------------------------------|
| Cy3 Terminal   | TCT TGT GAA CTC CCT ACT ATC CTT AAA CGC ATA TCT CTG A/3Cy3Sp/              |
| Cy3 INT8       | TCT TGT GAA CTC CCT ACT ATC CTT AAA CGC AT/iCy3/A TCT CTG A                |
| Cy3 INT12      | TCT TGT GAA CTC CCT ACT ATC CTT AAA C/iCy3/GC ATA TCT CTG A                |
| Cy3 INT5       | TCT TGT GAA CTC CCT ACT ATC CTT AAA CGC ATA TC/iCy3/T CTG A                |
| Cy5-Trunc.     | /5Cy5/GTG TAT GAC CCC TAT ATG TG                                           |
| Strand 1       | ATA GTA GGG AGT TCA CAA GAT GTA TAA GCA AAT ATT TAA A                      |
| Bio5'Comp      | TTG CAT GCC TGC AGG TCG ACT CTA GTT TTT/Bio-3'/                            |
| Splint         | AAA CTA GAG TCG ACC TGC AGG CAT GCA ATT TAA ATA TTT GCT TAT ACA            |
| NT-92a         | ACAGGCCGGGA-TCAGAGATATGCGTTTAAGG TTTT CACATATAGGGGTCATACAC-<br>CAAGTGCAATA |
| NT-652         | TCACAACCCTA-TCAGAGATATGCGTTTAAGG TTTT CACATATAGGGGTCATACAC-<br>GTGGCGCCATT |
| NT-107         | GATAGCCCTGT-TCAGAGATATGCGTTTAAGG TTTT CACATATAGGGGTCATACAC-<br>ACAATGCTGCT |
| NT-let7a       | AACTATACAAC-TCAGAGATATGCGTTTAAGG TTTT CACATATAGGGGTCATACAC-<br>CTACTACCTCA |
| DNA92a 22nt    | TAT TGC ACT TGT CCC GGC CTG T                                              |
| DNA652 21nt    | AAT GGC GCC ACT AGG GTT GTG                                                |
| DNA107 23nt    | AGC AGC ATT GTA CAG GGC TAT CA                                             |
| DNA-let7a 22nt | TGA GGT AGT AGG TTG TAT AGT T                                              |

Biotin- and fluorophore-modified DNA oligonucleotides were purchased HPLC purified. The four common DNA oligonucleotides found in each NT sensor are highlighted in red. Target binding regions in probe strands are highlighted in blue and magenta. The probe complementary region on fluorophore labeled strands are underlined.

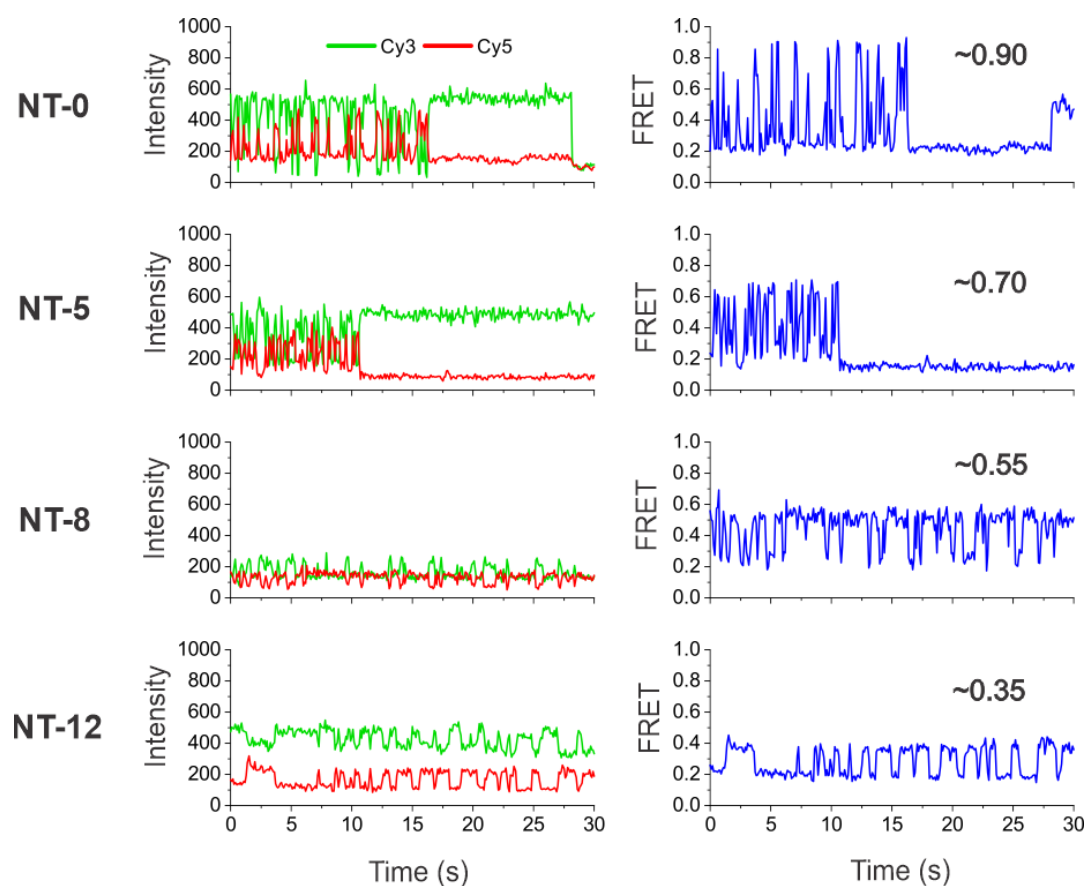

**Figure S1.** Representative intensity-time and  $E_{\text{FRET}}$ -time traces showing a highly dynamic behavior for each sensor. Each sensor was characterized individually showing distinct high-FRET states with a mutual low-FRET state of  $\sim 0.2$  that indicates an unbinding event. Target was added at 100 pM in all experiments.

**Table S2.** DNA sequences for single-point mismatch mutants of the target let-7a.

| Name            | Sequence (5' $\rightarrow$ 3') |
|-----------------|--------------------------------|
| Mutant 1 (G11A) | TGA GGT AGT AAG TTG TAT AGT T  |
| Mutant 2 (G12A) | TGA GGT AGT AGA TTG TAT AGT T  |
| Mutant 3 (T6C)  | TGA GGC AGT AGG TTG TAT AGT T  |
| Mutant 4 (A17G) | TGA GGT AGT AGG TTG TGT AGT T  |

Mutated bases are highlighted in red. (G11A) implies that the 11<sup>th</sup> Guanine nucleotide from the 5'-end is altered to adenine.

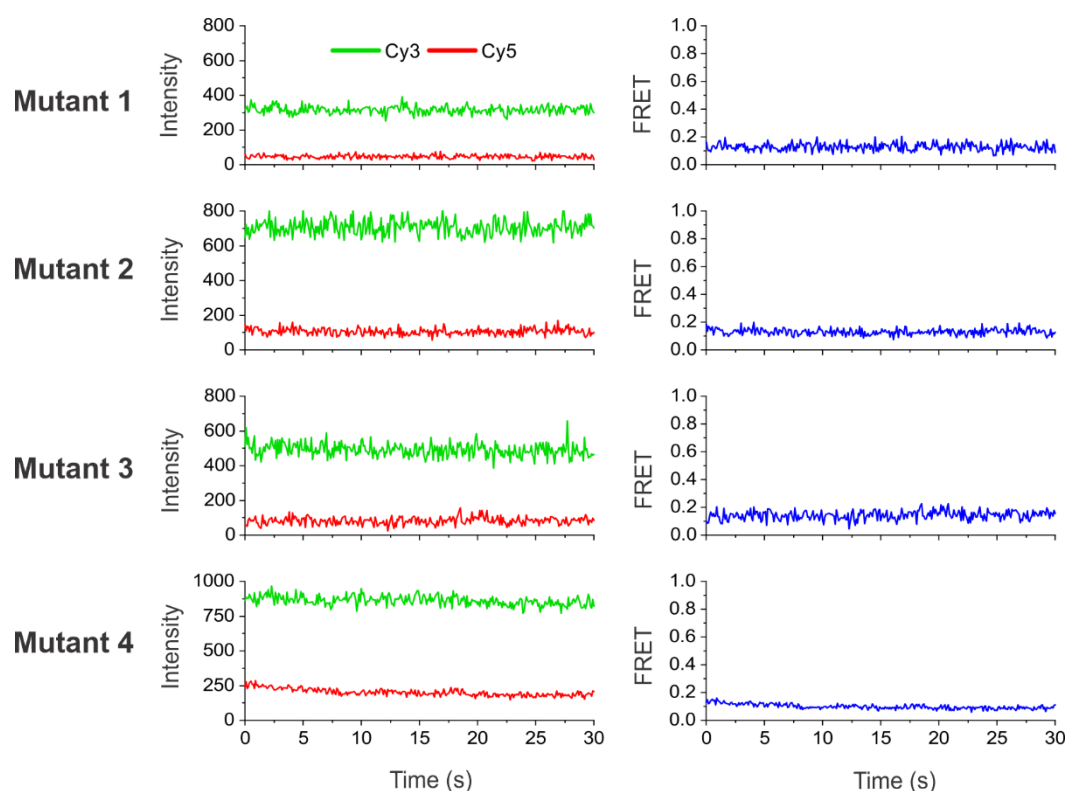

**Figure S2.** Representative intensity-time and  $E_{\text{FRET}}$ -time traces for each mutant. A low FRET of  $\sim 0.2$  was observed for the sets of molecules collected for each mutant, indicating an open conformation of the sensor. Mutants were added at 100 pM in all experiments.

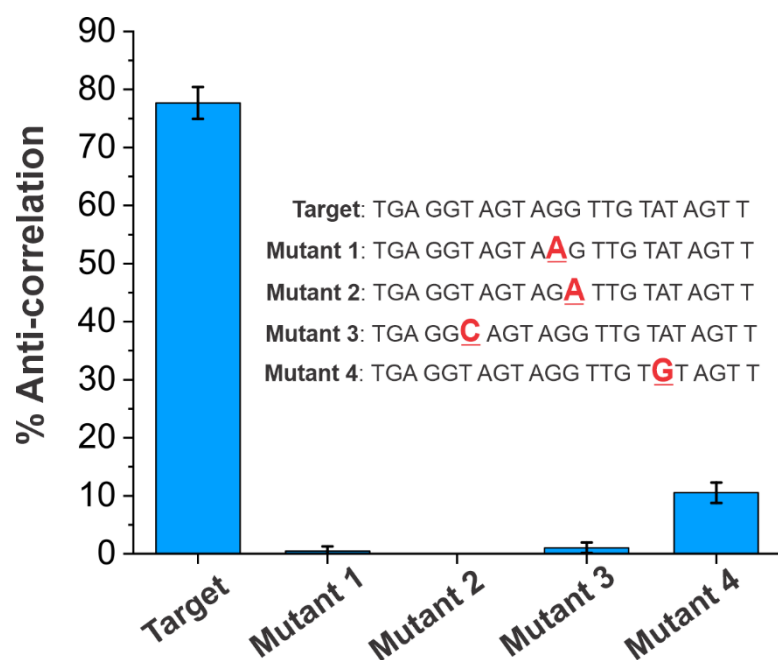

**Figure S3.** Validation of sensor specificity. Sensor specificity was tested using a nearly saturating concentration of the let-7a target (100 pM) specific to NT-5 and four other mutants. Sequences for the fully complementary target and mutants are shown with the single-point mutations highlighted in red and underlined. All data were obtained from the analysis of 155-213 molecules. Error bars represent standard deviation (SD) calculated after randomly assigning the molecules into three different groups.
